# Supplementary material
Source: HighWire-hosted journal article supplement (https://erj.ersjournals.com/content/58/3/2004188)

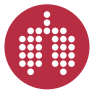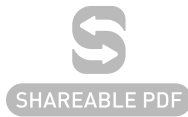

# Chest radiography or computed tomography for COVID-19 pneumonia? Comparative study in a simulated triage setting

Nicola Sverzellati<sup>1</sup>, Christopher J. Ryerson<sup>2</sup>, Gianluca Milanese<sup>1</sup>, Elisabetta A. Renzoni<sup>3</sup>, Annalisa Volpi<sup>4</sup>, Paolo Spagnolo<sup>5</sup>, Francesco Bonella , Ivan Comelli<sup>7</sup>, Paola Affanni , Licia Veronesi<sup>8</sup>, Carmelinda Manna<sup>1</sup>, Andrea Ciuni<sup>1</sup>, Carlotta Sartorio<sup>1</sup>, Giulia Tringali<sup>1</sup>, Mario Silva<sup>1</sup>, Emanuele Michieletti<sup>9</sup>, Davide Colombi<sup>9</sup> and Athol U. Wells<sup>3</sup>

<sup>1</sup>Scienze Radiologiche, Dipartimento di Medicina e Chirurgia, University Hospital of Parma, Parma, Italy. <sup>2</sup>Dept of Medicine, University of British Columbia and Centre for Heart Lung Innovation, St Paul's Hospital, Vancouver, BC, Canada. <sup>3</sup>Interstitial Lung Disease Unit, Royal Brompton Hospital, Imperial College London, London, UK. <sup>4</sup>1st Anesthesia and Intensive Care Unit, University Hospital of Parma, Parma, Italy. <sup>5</sup>Respiratory Disease Unit, Dept of Cardiac, Thoracic, Vascular Sciences and Public Health, University of Padova, Padua, Italy. <sup>6</sup>Center for Interstitial and Rare Lung Diseases, Pneumology Dept, Ruhrandklinik University Hospital, University of Duisburg-Essen, Essen, Germany. <sup>7</sup>Unità Operativa Pronto Soccorso e Medicina d'Urgenza, Azienda Ospedaliero-Universitaria di Parma, Parma, Italy. <sup>8</sup>Dept of Medicine and Surgery, University of Parma, Parma, Italy. <sup>9</sup>Dept of Radiological Functions, Radiology Unit, "Guglielmo da Saliceto" Hospital, Piacenza, Italy.

Corresponding author: Nicola Sverzellati ([nicola.sverzellati@unipr.it](mailto:nicola.sverzellati@unipr.it))

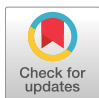

Shareable abstract (@ERSpublications)

**This study does not support the routine use of CT to stage disease extent in COVID-19 pneumonia, despite superior interobserver agreement, as chest radiography extent is an equally powerful prognostic determinant** <https://bit.ly/3rdJuxj>

**Cite this article as:** Sverzellati N, Ryerson CJ, Milanese G, *et al.* Chest radiography or computed tomography for COVID-19 pneumonia? Comparative study in a simulated triage setting. *Eur Respir J* 2021; 58: 2004188 [DOI: 10.1183/13993003.04188-2020].

This single-page version can be shared freely online.

Copyright ©The authors 2021.

This version is distributed under the terms of the Creative Commons Attribution Non-Commercial Licence 4.0. For commercial reproduction rights and permissions contact [permissions@ersnet.org](mailto:permissions@ersnet.org)

This article has supplementary material available from [erj.ersjournals.com](http://erj.ersjournals.com)

Received: 2 Nov 2020  
Accepted: 27 Jan 2021

## Abstract

**Introduction** For the management of patients referred to respiratory triage during the early stages of the severe acute respiratory syndrome coronavirus type 2 (SARS-CoV-2) pandemic, either chest radiography or computed tomography (CT) were used as first-line diagnostic tools. The aim of this study was to compare the impact on the triage, diagnosis and prognosis of patients with suspected COVID-19 when clinical decisions are derived from reconstructed chest radiography or from CT.

**Methods** We reconstructed chest radiographs from high-resolution CT (HRCT) scans. Five clinical observers independently reviewed clinical charts of 300 subjects with suspected COVID-19 pneumonia, integrated with either a reconstructed chest radiography or HRCT report in two consecutive blinded and randomised sessions: clinical decisions were recorded for each session. Sensitivity, specificity, positive predictive value (PPV), negative predictive value (NPV) and prognostic value were compared between reconstructed chest radiography and HRCT. The best radiological integration was also examined to develop an optimised respiratory triage algorithm.

**Results** Interobserver agreement was fair (Kendall's  $W=0.365$ ,  $p<0.001$ ) by the reconstructed chest radiography-based protocol and good (Kendall's  $W=0.654$ ,  $p<0.001$ ) by the CT-based protocol. NPV assisted by reconstructed chest radiography (31.4%) was lower than that of HRCT (77.9%). In case of indeterminate or typical radiological appearance for COVID-19 pneumonia, extent of disease on reconstructed chest radiography or HRCT were the only two imaging variables that were similarly linked to mortality by adjusted multivariable models

**Conclusions** The present findings suggest that clinical triage is safely assisted by chest radiography. An integrated algorithm using first-line chest radiography and contingent use of HRCT can help optimise management and prognostication of COVID-19.

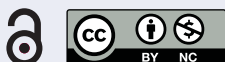

Supplement: inline-supplementary-material-3 [file inline-supplementary-material-3.pdf]
